# Supplementary material for: A Developed NK-92MI Cell Line with Siglec-7neg Phenotype Exhibits High and Sustainable Cytotoxicity against Leukemia Cells
Source: MDPI journal article supplement (doi:10.3390/ijms19041073), 2018-04-04
Supplement: s1 [file s1]

## Supplementary Data

### Figure S1

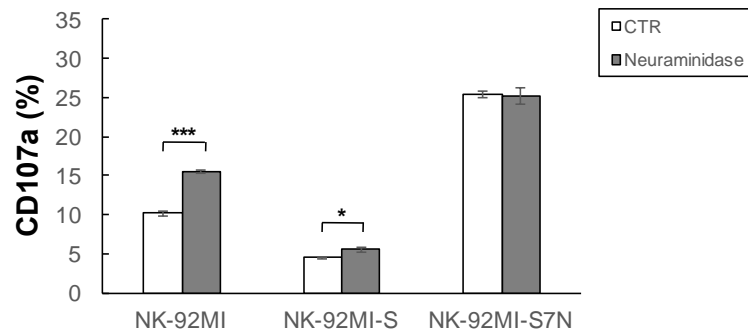

**Figure S1.** Cell surface sialylation on target cells influenced NK degranulation activity of NK-92MI and NK-92MI-S cells. CD107a degranulation activity in NK-92MI, -S, and -S7N were examined by incubations of neuraminidase-treated and untreated control THP-1 cells with equal number of fluorescence-labeled NK cells. Results were presented as mean  $\pm$  SD of triplicates (\* $P$ <0.05; \*\*\*  $P$ <0.001). The results were representative of three independent experiments.
